# Supplementary material for: Taxonomic review of living planktonic foraminifera
Source: Copernicus journal article supplement (doi:10.5194/jm-41-29-2022), 2022-03-11
Supplement: Supplementary file 1 [file Supplement_1.pdf › Supplement_1.pdf]

Overview of extant species of planktonic foraminifera (Appendix 1 to Brummer and Kucera, 2022)

|                                                                              |                                                                                                                                                                                                                                                                                                                                                                                                                                                                                                                                                                                                                                                                                                                                                                                                                                                                                                                                                                                                                                                   |                                                                                                                                                                                                                                                                                                                                                                                                                                                                                                                                                                                                                                                                                                                                                                                                                                                                                                                                                                                                                                                                                                                                                                                                                                                                                                                                                                                                                                                                                                                                                                                                                                                                                                                                   |                                                                                                                                                                                                                                                                                                                                                                                                                                                                                                                                                                                                                                                                                                                                                                                                              |
|------------------------------------------------------------------------------|---------------------------------------------------------------------------------------------------------------------------------------------------------------------------------------------------------------------------------------------------------------------------------------------------------------------------------------------------------------------------------------------------------------------------------------------------------------------------------------------------------------------------------------------------------------------------------------------------------------------------------------------------------------------------------------------------------------------------------------------------------------------------------------------------------------------------------------------------------------------------------------------------------------------------------------------------------------------------------------------------------------------------------------------------|-----------------------------------------------------------------------------------------------------------------------------------------------------------------------------------------------------------------------------------------------------------------------------------------------------------------------------------------------------------------------------------------------------------------------------------------------------------------------------------------------------------------------------------------------------------------------------------------------------------------------------------------------------------------------------------------------------------------------------------------------------------------------------------------------------------------------------------------------------------------------------------------------------------------------------------------------------------------------------------------------------------------------------------------------------------------------------------------------------------------------------------------------------------------------------------------------------------------------------------------------------------------------------------------------------------------------------------------------------------------------------------------------------------------------------------------------------------------------------------------------------------------------------------------------------------------------------------------------------------------------------------------------------------------------------------------------------------------------------------|--------------------------------------------------------------------------------------------------------------------------------------------------------------------------------------------------------------------------------------------------------------------------------------------------------------------------------------------------------------------------------------------------------------------------------------------------------------------------------------------------------------------------------------------------------------------------------------------------------------------------------------------------------------------------------------------------------------------------------------------------------------------------------------------------------------|
| <b>Hastigerinidae</b><br><i>Thick spines, thin shell</i>                     | Inflated chambers: <b>Hastigerina</b><br>Clavate chambers: <b>Hastigerinella</b><br>Spine bases at chamber tips: <b>Orcadia</b>                                                                                                                                                                                                                                                                                                                                                                                                                                                                                                                                                                                                                                                                                                                                                                                                                                                                                                                   |  <div>P<br/>P<br/>M</div>                                                                                                                                                                                                                                                                                                                                                                                                                                                                                                                                                                                                                                                                                                                                                                                                                                                                                                                                                                                                                                                                                                                                                                                                                                                                                                                                                                                                                                                                                                                                                                                                                         |  <div><i>Hastigerina pelagica</i><br/><i>Hastigerinella digitata</i><br/><i>Orcadia riedeli</i></div>                                                                                                                                                                                                                                                                                                                                                                                                                                                                                                                                                                                                                      |
| <b>Globigerinidae</b><br><i>Spines</i><br><i>Visible pores</i>               | Extraumbilical aperture: <b>Globigerinella</b><br>Near planispiral coiling & Spherical chambers<br>Near planispiral coiling & Digitate chambers<br>Near planispiral coiling & Radially elongated chambers<br>Trochospiral coiling & Radially elongated chambers<br><br>Umbilical aperture & Supplementary apertures &<br>Cortex: <b>Sphaeroidinella</b><br>Cancellate wall: <b>Trilobatus</b><br>Symmetrical umbilical aperture: <b>Globigerinoides</b><br>Three chambers & pink<br>Three chambers & white<br>Three chambers & radially compressed<br>Four chambers & radially compressed<br>Four chambers & small<br>Spherical terminal chamber: <b>Orbulina</b><br><br>Umbilical aperture & No supplementary apertures &<br>Digitate chambers: <b>Beella</b><br>Ampullate last chamber: <b>Turborotalita</b><br>Six or more chambers<br>Five chambers & small, compact outline<br>Five chambers & apertural flap<br>Cancellate wall, pigment: <b>Globoturborotalita</b><br>Pitted wall: <b>Globigerina</b><br>Apertural lip<br>No apertural lip |  <div>MP<br/>M<br/>M<br/>M</div><br> <div>M<br/>MS</div><br> <div>M</div>  <div>M</div>  <div>M</div>  <div>M</div>  <div>M</div>  <div>M</div><br> <div>M</div><br> <div>M</div>  <div>M</div>  <div>M</div>  <div>M</div><br> <div>M</div>  <div>MS</div>                                                                                                                                                                                                        |  <div><i>Globigerinella siphonifera</i><br/><i>Globigerinella adamsi</i><br/><i>Globigerinella radians</i><br/><i>Globigerinella calida</i><br/><br/><i>Sphaeroidinella dehiscens</i><br/><i>Trilobatus sacculifer</i><br/><br/><i>Globigerinoides ruber ruber</i><br/><i>Globigerinoides ruber albus</i><br/><i>Globigerinoides elongatus</i><br/><i>Globigerinoides conglobatus</i><br/><i>Globigerinoides tenellus</i><br/><i>Orbulina universa</i><br/><br/><i>Beella digitata</i><br/><br/><i>Turborotalita humilis</i><br/><i>Turborotalita clarkei</i><br/><i>Turborotalita quinqueloba</i><br/><i>Globoturborotalita rubescens</i><br/><br/><i>Globigerina falconensis</i><br/><i>Globigerina bulloides</i></div> |
| <b>Globorotalidae</b><br><i>No spines</i><br><i>Visible pores</i>            | Round periphery & Laterally compressed chambers: <b>Globorotaloides</b><br>Straight sutures on spiral side<br>Curved sutures on spiral side<br>Quadrato to inflated chambers &<br>Umbilical-extraumbilical aperture: <b>Neogloboquadrina</b><br>Five or more chambers<br>Dominantly dextral<br>Dominantly sinistral<br>Umbilical aperture: <b>Globoquadrina</b><br>Cortex & Streptospiral final chamber: <b>Pulleniatina</b><br><br>Acute periphery: <b>Globorotalia</b><br>Keel & flat spiral side<br>Keel & flat spiral side & deep umbilicus<br>Keel & spirally convex shell<br>Keel & thin, laterally compressed shell<br>Keel & tear-drop lateral shell outline<br>Keel & lateral shell outline thickest on last chamber<br>No continuous keel, lobate outline<br>No keel & thin, delicate shell<br>No keel & flat spiral side<br>No keel & cortex<br><br>Sutural apertures: <b>Candeina</b>                                                                                                                                                 |  <div>M<br/>M</div><br> <div>D</div>  <div>D</div>  <div>S</div>  <div>M</div>  <div>D</div><br> <div>DS</div>  <div>S</div>  <div>DS</div>  <div>S</div>  <div>S</div>  <div>S</div>  <div>DS</div>  <div>D</div>  <div>DS</div>  <div>S</div><br> <div>M</div> |  <div><i>Globorotaloides hexagonus</i><br/><i>Globorotaloides oveyi</i><br/><br/><i>Neogloboquadrina dutertrei</i><br/><i>Neogloboquadrina incompta</i><br/><i>Neogloboquadrina pachyderma</i><br/><i>Globoquadrina conglomeraata</i><br/><i>Pulleniatina obliquiloculata</i><br/><br/><i>Globorotalia truncatulinoides</i><br/><i>Globorotalia cavernula</i><br/><i>Globorotalia hirsuta</i><br/><i>Globorotalia cultrata</i><br/><i>Globorotalia tumida</i><br/><i>Globorotalia unguolata</i><br/><i>Globorotalia eastropacia</i><br/><i>Globorotalia scitula</i><br/><i>Globorotalia crassaformis</i><br/><i>Globorotalia inflata</i><br/><br/><i>Candeina nitida</i></div>                                           |
| <b>Candeinidae</b><br><i>Pores not visible</i><br><i>in stereomicroscope</i> | Umbilical aperture, often bulla: <b>Globigerinita</b><br>Low trochospire<br>High trochospire, lobate shell outline<br>High trochospire, compact shell outline<br><br>Umbilical-extraumbilical aperture: <b>Tenuitellita</b><br>Four chambers<br>Five chambers, radially elongated chambers<br>Five or more chambers, curved sutures                                                                                                                                                                                                                                                                                                                                                                                                                                                                                                                                                                                                                                                                                                               |  <div>M</div>  <div>M</div>  <div>M</div><br> <div>M</div>  <div>M</div>  <div>M</div>                                                                                                                                                                                                                                                                                                                                                                                                                                                                                                                                                                                                                                                                                                                                                                                                                                                                                                                                                                                                                                                                                                                          |  <div><i>Globigerinita glutinata</i><br/><i>Globigerinita uvula</i><br/><i>Globigerinita minuta</i><br/><br/><i>Tenuitellita iota</i><br/><i>Tenuitellita parkerae</i><br/><i>Tenuitellita fleisheri</i></div>                                                                                                                                                                                                                                                                                                                                                                                                                                                                                                          |
| <b>Incertae sedis &amp; serial chambers</b>                                  | Kidney-shaped chambers: <b>Dentigloborotalia</b><br>Inflated chambers, radial ridges on umbilical side: <b>Berggrenia</b><br>Biserial chambers: <b>Bolivina</b><br>Triserial chambers: <b>Neogallitellia</b>                                                                                                                                                                                                                                                                                                                                                                                                                                                                                                                                                                                                                                                                                                                                                                                                                                      |  <div>M</div>  <div>S</div>  <div>O</div>  <div>O</div>                                                                                                                                                                                                                                                                                                                                                                                                                                                                                                                                                                                                                                                                                                                                                                                                                                                                                                                                                                                                                                                                                                                                                                                                                                                                                                                               |  <div><i>Dentigloborotalia anfracta</i><br/><i>Berggrenia pumilio</i><br/><i>Bolivina variabilis</i><br/><i>Neogallitellia vivans</i></div>                                                                                                                                                                                                                                                                                                                                                                                                                                                                                                                                                                             |

Typical size of adults

Abundance

Coiling direction

Biogeography

 > 250 µm  > 150 µm  < 150 µm  abundant  common  rare

P – planispiral S – sinistral D – dextral  
M – mixed  
MS – mixed with bias to sinistral

 warm  temperate  
 cold  polar
