# Supplementary material for: Taxonomic review of living planktonic foraminifera
Source: Copernicus journal article supplement (doi:10.5194/jm-41-29-2022), 2022-03-11
Supplement: Supplementary file 2 [file Supplement_2.pdf › Supplement_2.pdf]

| Nr | Speceis name                         | Author                       |
|----|--------------------------------------|------------------------------|
| 1  | <i>Beella digitata</i>               | (Brady, 1879)                |
| 2  | <i>Berggrenia pumilio</i>            | (Parker, 1962)               |
| 3  | <i>Bolivina variabilis</i>           | (Williamson, 1858)           |
| 4  | <i>Candeina nitida</i>               | d'Orbigny, 1839              |
| 5  | <i>Dentigloborotalia anfracta</i>    | (Parker, 1967)               |
| 6  | <i>Globigerina bulloides</i>         | d'Orbigny, 1826              |
| 7  | <i>Globigerina falconensis</i>       | Blow, 1959                   |
| 8  | <i>Globigerinella adamsi</i>         | (Banner and Blow, 1959)      |
| 9  | <i>Globigerinella calida</i>         | (Parker, 1962)               |
| 10 | <i>Globigerinella radians</i>        | (Egger, 1893)                |
| 11 | <i>Globigerinella siphonifera</i>    | (d'Orbigny, 1839)            |
| 12 | <i>Globigerinita glutinata</i>       | (Egger, 1893)                |
| 13 | <i>Globigerinita minuta</i>          | (Natland, 1938)              |
| 14 | <i>Globigerinita uvula</i>           | (Ehrenberg, 1862)            |
| 15 | <i>Globigerinoides conglobatus</i>   | (Brady, 1879)                |
| 16 | <i>Globigerinoides elongatus</i>     | (d'Orbigny, 1826)            |
| 17 | <i>Globigerinoides ruber albus</i>   | Morard et al., 2019          |
| 18 | <i>Globigerinoides ruber ruber</i>   | (d'Orbigny, 1839)            |
| 19 | <i>Globigerinoides tenellus</i>      | Parker, 1958                 |
| 20 | <i>Globoquadrina conglomerata</i>    | (Schwager, 1866)             |
| 21 | <i>Globorotalia cavernula</i>        | Bé, 1967                     |
| 22 | <i>Globorotalia crassaformis</i>     | (Galloway and Wissler, 1927) |
| 23 | <i>Globorotalia cultrata</i>         | (d'Orbigny, 1839)            |
| 24 | <i>Globorotalia eastropacia</i>      | Boltovskoy, 1974             |
| 25 | <i>Globorotalia hirsuta</i>          | (d'Orbigny, 1839)            |
| 26 | <i>Globorotalia inflata</i>          | (d'Orbigny, 1839)            |
| 27 | <i>Globorotalia scitula</i>          | (Brady, 1882)                |
| 28 | <i>Globorotalia truncatulinoides</i> | (d'Orbigny, 1839)            |
| 29 | <i>Globorotalia tumida</i>           | (Brady, 1877)                |
| 30 | <i>Globorotalia unguolata</i>        | Bermúdez, 1961               |
| 31 | <i>Globorotaloides hexagonus</i>     | (Natland, 1938)              |
| 32 | <i>Globorotaloides oveyi</i>         | (Buckley, 1973)              |
| 33 | <i>Globoturborotalita rubescens</i>  | (Hofker, 1956)               |
| 34 | <i>Hastigerina pelagica</i>          | (d'Orbigny, 1839)            |
| 35 | <i>Hastigerinella digitata</i>       | (Rhumbler, 1911)             |
| 36 | <i>Neogallitellia vivans</i>         | (Cushman, 1934)              |
| 37 | <i>Neogloboquadrina dutertrei</i>    | (d'Orbigny, 1839)            |
| 38 | <i>Neogloboquadrina incompta</i>     | (Cifelli, 1961)              |
| 39 | <i>Neogloboquadrina pachyderma</i>   | (Ehrenberg, 1862)            |
| 40 | <i>Orbulina universa</i>             | d'Orbigny, 1839              |
| 41 | <i>Orcadia riedeli</i>               | (Rögl and Bolli, 1973)       |
| 42 | <i>Pulleniatina obliquiloculata</i>  | (Parker and Jones, 1865)     |
| 43 | <i>Sphaeroidinella dehiscens</i>     | (Parker and Jones, 1865)     |
| 44 | <i>Tenuitellita fleisheri</i>        | Li, 1987                     |
| 45 | <i>Tenuitellita iota</i>             | (Parker, 1962)               |
| 46 | <i>Tenuitellita parkerae</i>         | (Brönnimann and Resig, 1971) |
| 47 | <i>Trilobatus sacculifer</i>         | (Brady, 1877)                |
| 48 | <i>Turborotalita clarkei</i>         | (Rögl and Bolli, 1973)       |
| 49 | <i>Turborotalita humilis</i>         | (Brady, 1884)                |
| 50 | <i>Turborotalita quinqueloba</i>     | (Natland, 1938)              |
