# Supplementary material for: Taxonomic review of living planktonic foraminifera
Source: Copernicus journal article supplement (doi:10.5194/jm-41-29-2022), 2022-03-11
Supplement: Supplementary file [file jm-41-29-2022-supplement-title-page.pdf › jm-41-29-2022-supplement-title-page.pdf]

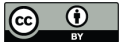

## *Supplement of*

# **Taxonomic review of living planktonic foraminifera**

**Geert-Jan A. Brummer and Michal Kučera**

*Correspondence to:* Michal Kučera (mkucera@marum.de)

- jm-41-29-2022-supplement-title-page.pdf
- Supplement\_1.pdf
- Supplement\_2.pdf

The copyright of individual parts of the supplement might differ from the article licence.
